# Supplementary material
Source: Springer Nature journal article supplement (https://www.springermedizin.de/resource/supplementary/12885_2013_4204_MOESM4_ESM.pdf/9465756)

**A**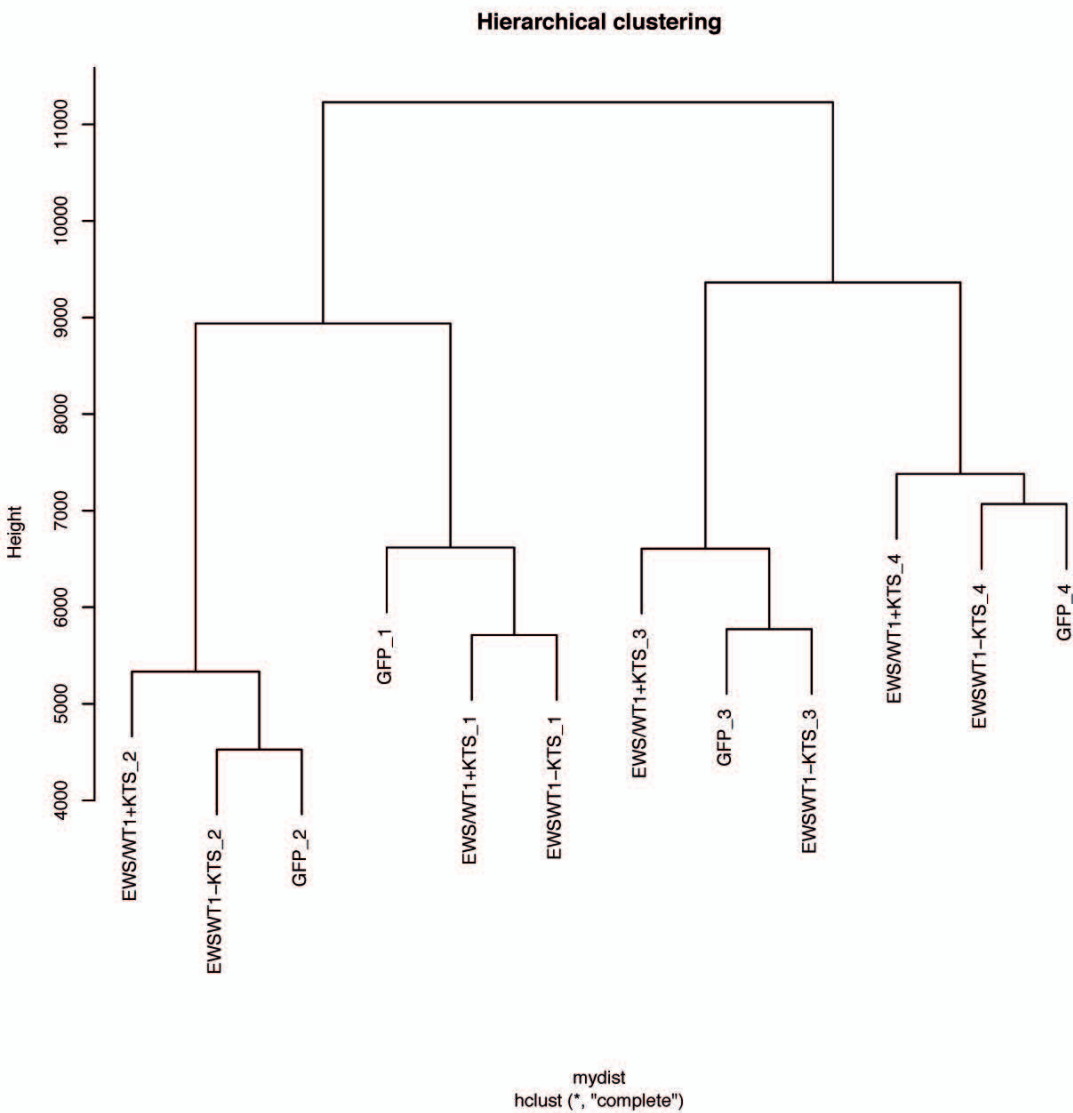**B****Multidimensional Scaling plot of filtered list**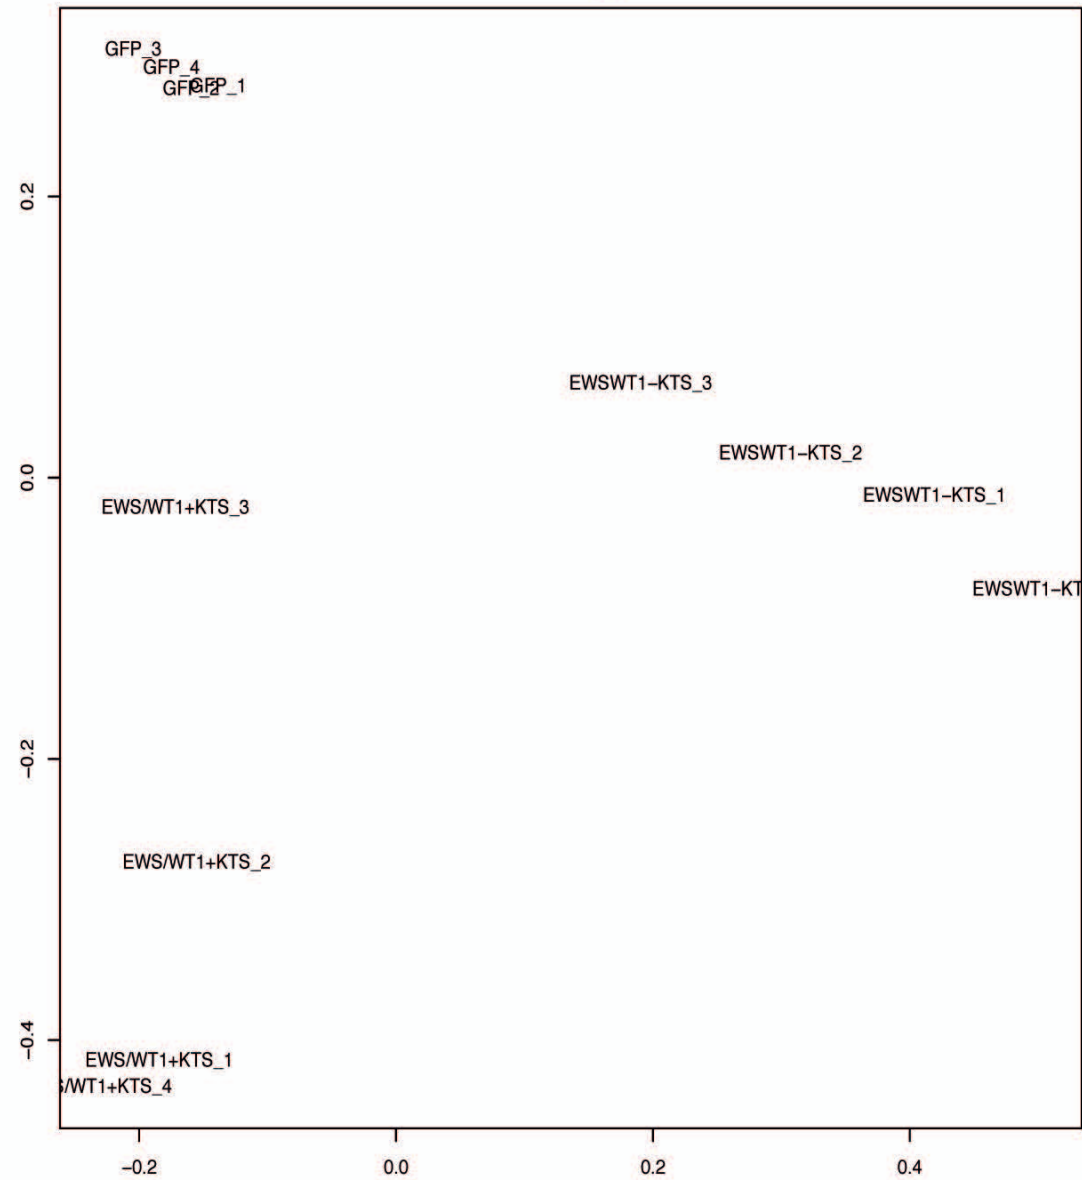

Supplement: MOESM4 [file 9465756]
